# Supplementary material for: Institutional Context of Pest Management Science in the Global South
Source: MDPI journal article supplement (doi:10.3390/plants12244143), 2023-12-12
Supplement: s1 [file s1]

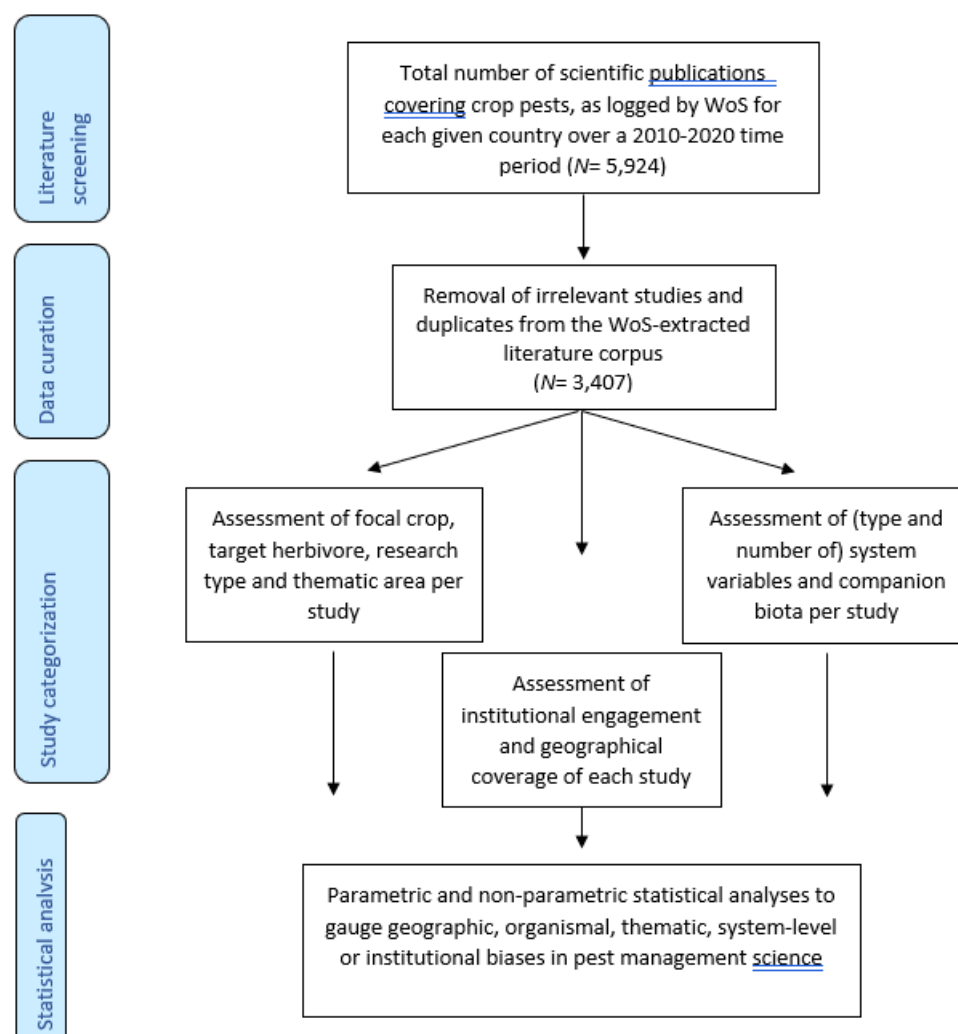

**Figure S1.** Prisma flowchart summarizing how bibliometric methods and literature analyses were used to characterize target herbivore, research type, thematic focus, system-level variables and companion biota of pest management science in 65 developing countries; WoS: Web of Science.

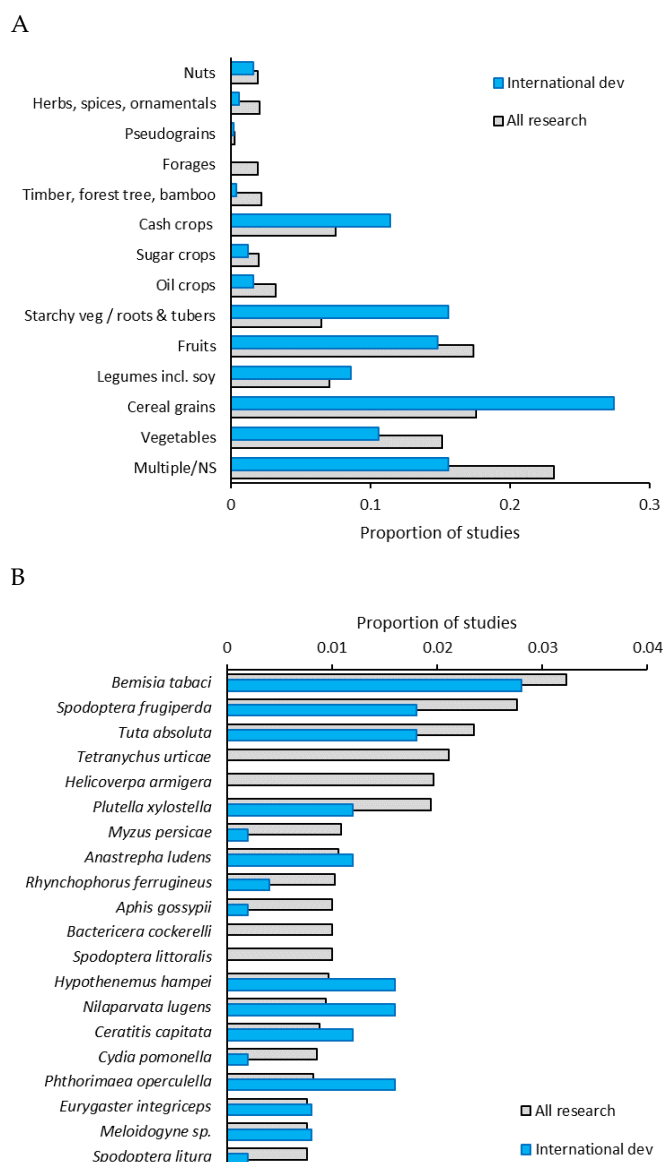

**Figure S2. Principal crop (A) and pest foci (B) of pest management science in 65 developing countries.** Patterns are plotted for 3,407 peer-reviewed publications over 2010–2020. In each panel, a distinction is made between all published research and studies with involvement of international development partners. Panel A organizes data in 14 crop categories, in which NS refers to ‘non-specified’. Fruits comprise both annual and perennial fruits e.g., date palm. Oil crops include sunflower, oilseed and olive, while pseudo-grains cover amaranth, buckwheat, quinoa and chia. Panel B shows the proportion of studies that cover either of the 20 most researched pest taxa. .

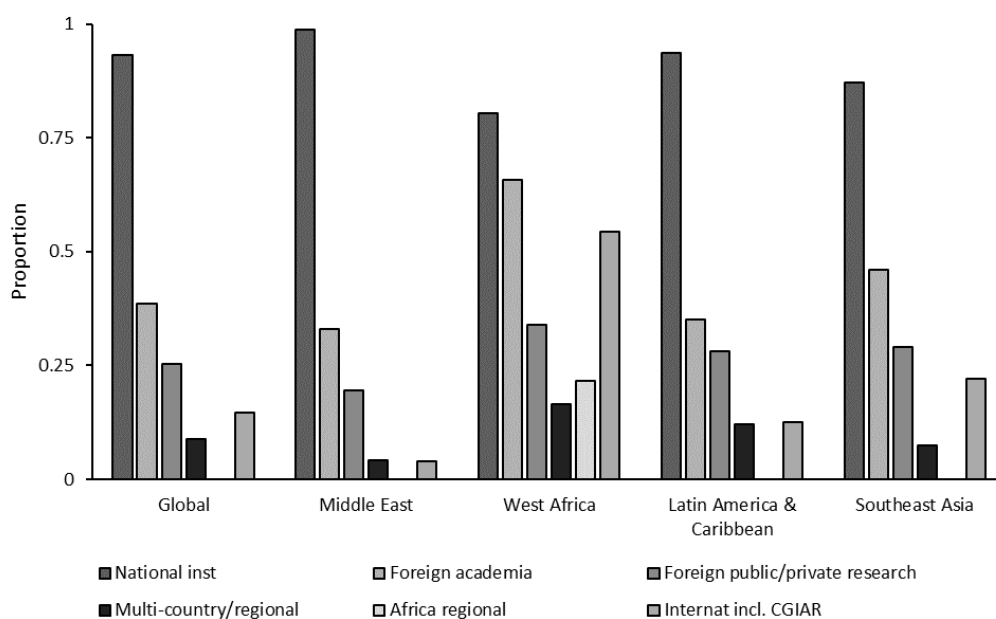

**Figure S3. Institutional engagement in pest management science in different regions of the Global South over 2010-2020.** Bar charts depict global and sub-regional patterns in the extent of involvement of national institutions, foreign academia and foreign public or private research institutions. Data are extracted from a total of 3,407 peer-reviewed international publications, covering 65 countries. Per geography, the proportion of studies with multi-country or regional cooperation or support from international development partners e.g., CGIAR is also plotted. For West Africa, regional cooperation at the continental level (i.e., Africa) is equally depicted.

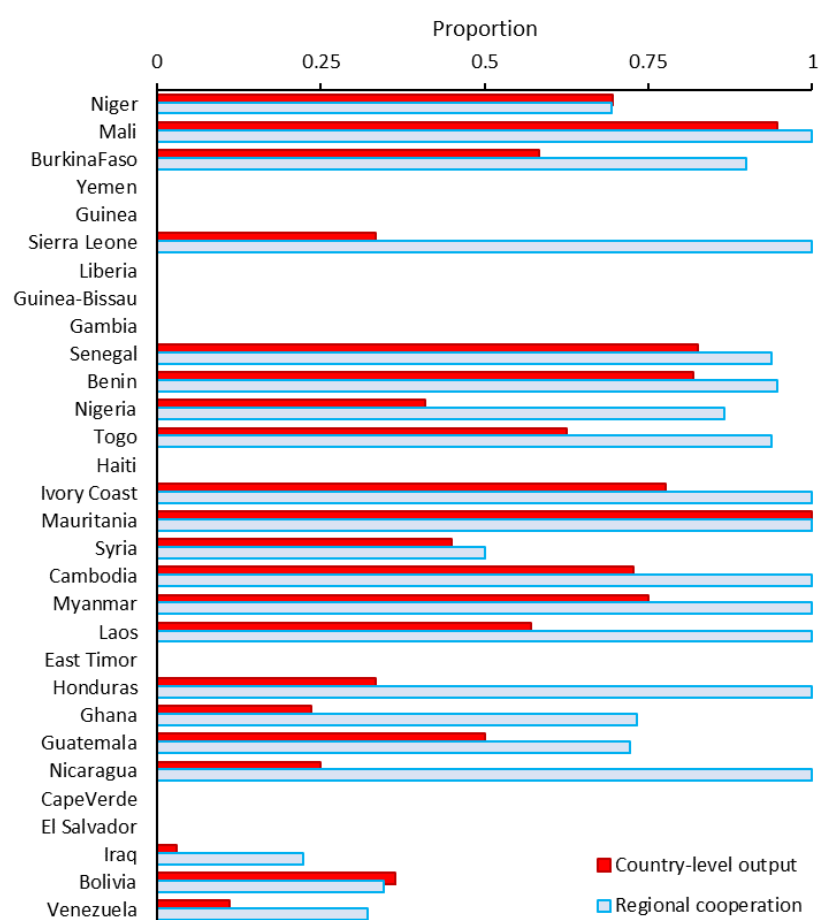

**Figure S4.** Relative contribution of international development cooperation in pest management science for the 30 least developed countries. Data refer to country-level publication output over 2010–2020. Per country, we plot the proportion of country-level research output (red) and regional cooperative studies (blue) in which development partners feature. Patterns are shown for countries within the 4 target sub-regions with human development index (HDI) rank equal or above 118. Countries are ranked from least (top) to most developed (bottom).

**Table S1.** Listing of countries that were included in the literature review, as organized by geographical sub-region.

| Middle East  | West Africa   | Latin America      | Southeast Asia |
|--------------|---------------|--------------------|----------------|
| Bahrain      | Benin         | Argentina          |                |
| Cyprus       | Burkina Faso  | Bolivia            |                |
| Egypt        | Cape Verde    | Brazil             |                |
| Iran         | Gambia        | Chile              |                |
| Iraq         | Ghana         | Colombia           | Brunei         |
| Israel       | Guinea        | Costa Rica         | Cambodia       |
| Jordan       | Guinea-Bissau | Cuba               | East Timor     |
| Kuwait       | Ivory Coast   | Dominican Republic | Indonesia      |
| Lebanon      | Liberia       | Ecuador            | Laos           |
| Oman         | Mali          | El Salvador        | Malaysia       |
| Palestine    | Mauritania    | Guatemala          | Myanmar        |
| Qatar        | Niger         | Haiti              | Philippines    |
| Saudi Arabia | Nigeria       | Honduras           | Singapore      |
| Syria        | Senegal       | Mexico             | Thailand       |
| Turkey       | Sierra Leone  | Nicaragua          | Vietnam        |
| UAE          | Togo          | Panama             |                |
| Yemen        |               | Paraguay           |                |
|              |               | Peru               |                |
|              |               | Uruguay            |                |
|              |               | Venezuela          |                |
